# Supplementary material
Source: publisher figshare collection journal article supplement (https://acs.figshare.com/ndownloader/files/23402345)
Supplement: Supplementary file 1 [file 23402345]

# Supporting Information

## How Does Microstructural Design Affect the Dynamics and Rheology of Segmented Polyurethanes?

Hamid Reza Heydarnezhad,<sup>§,†</sup> Naser Mohammadi,<sup>\*,§</sup> Arantxa Arbe,<sup>†</sup> and Angel Alegria<sup>†,‡</sup>

<sup>§</sup> Department of Polymer Engineering and Color Technology, Amirkabir University of Technology, Tehran 1591634311, Iran

<sup>†</sup> Centro de Física de Materiales (CSIC, UPV/EHU) and Materials Physics Center (MPC), Paseo Manuel de Lardizabal 5, E-20018 San Sebastián, Spain

<sup>‡</sup> Departamento de Física de Materiales, Universidad del País Vasco, Paseo Manuel Lardizábal 3, San Sebastian 20018, Spain

*\* Corresponding Author E-mail: [mohamadi@aut.ac.ir](mailto:mohamadi@aut.ac.ir)*

---

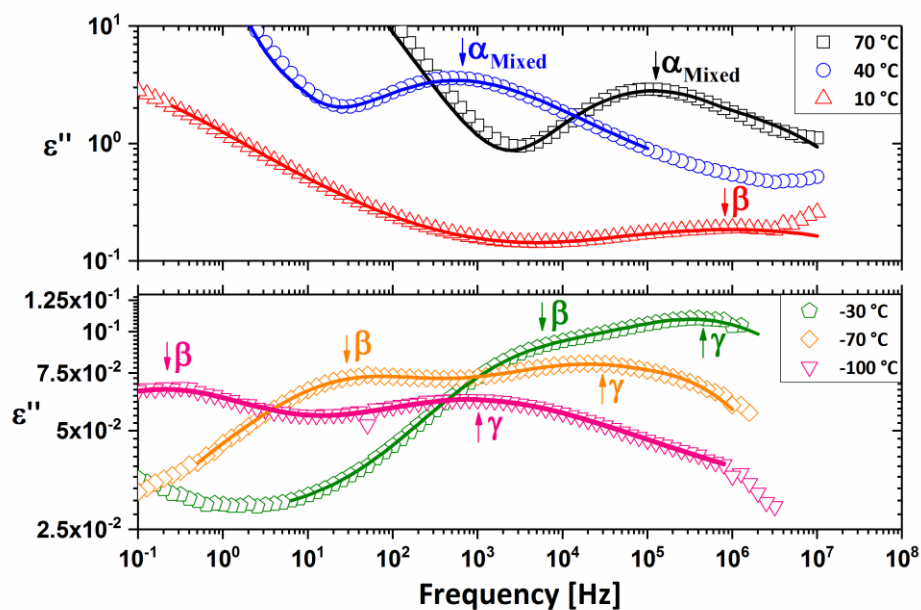

**Figure S1.** Dielectric loss spectrum of PU-425-H40 in different temperatures. Solid lines stand for the fits to the Havriliak–Negami equation.

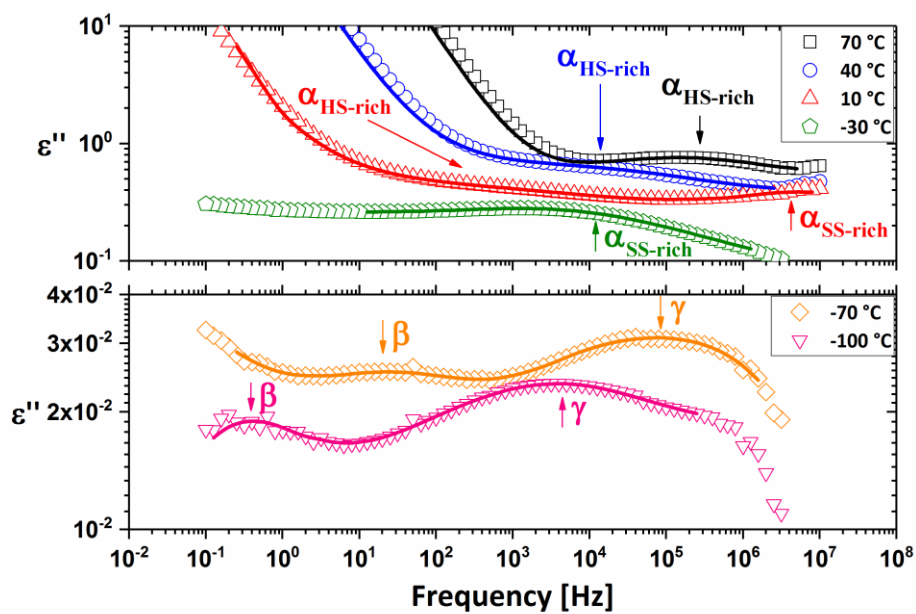

**Figure S2.** Dielectric loss spectrum of PU-2000-H40 in different temperatures. Solid lines stand for the fits to the Havriliak–Negami equation.

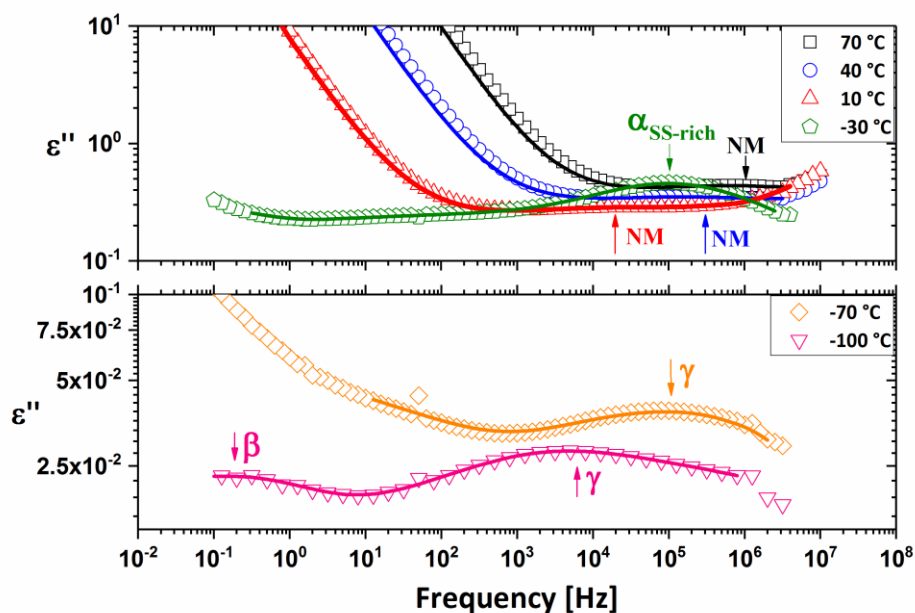

**Figure S3.** Dielectric loss spectrum of PU-4000-H40 in different temperatures. Solid lines stand for the fits to the Havriliak–Negami equation.

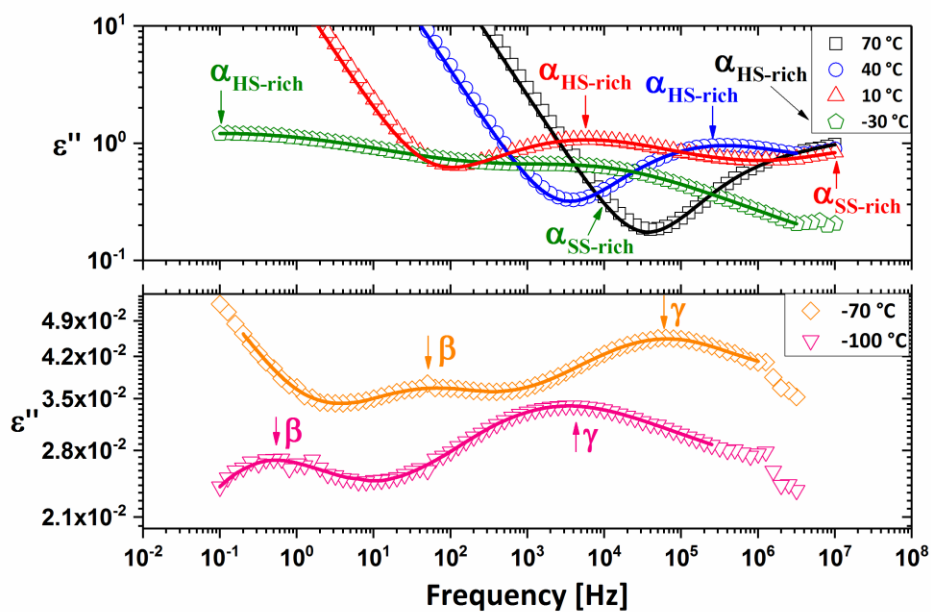

**Figure S4.** Dielectric loss spectrum of PU-2000-H20 in different temperatures. Solid lines stand for the fits to the Havriliak–Negami equation.

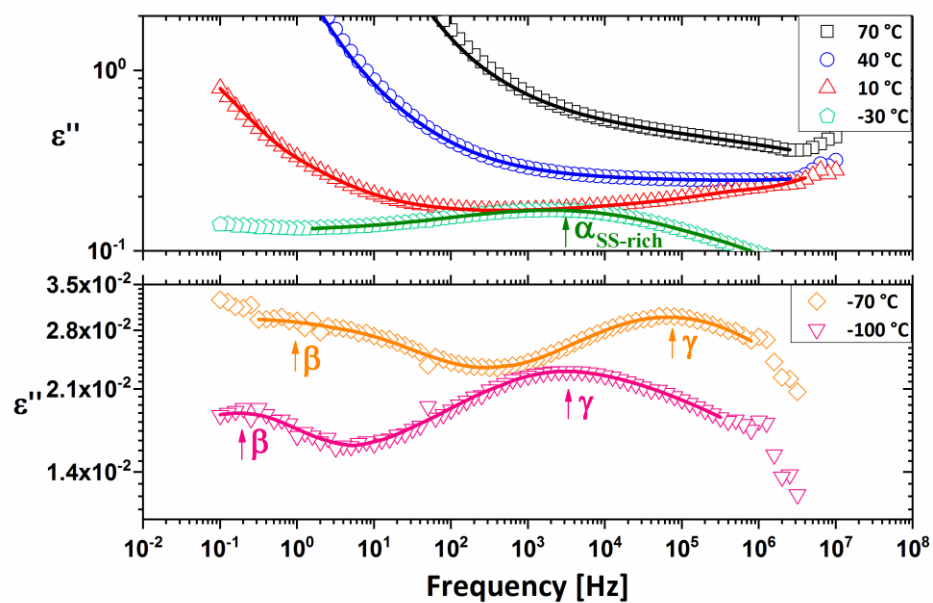

**Figure S5.** Dielectric loss spectrum of PU-2000-H60 in different temperatures. Solid lines stand for the fits to the Havriliak–Negami equation.

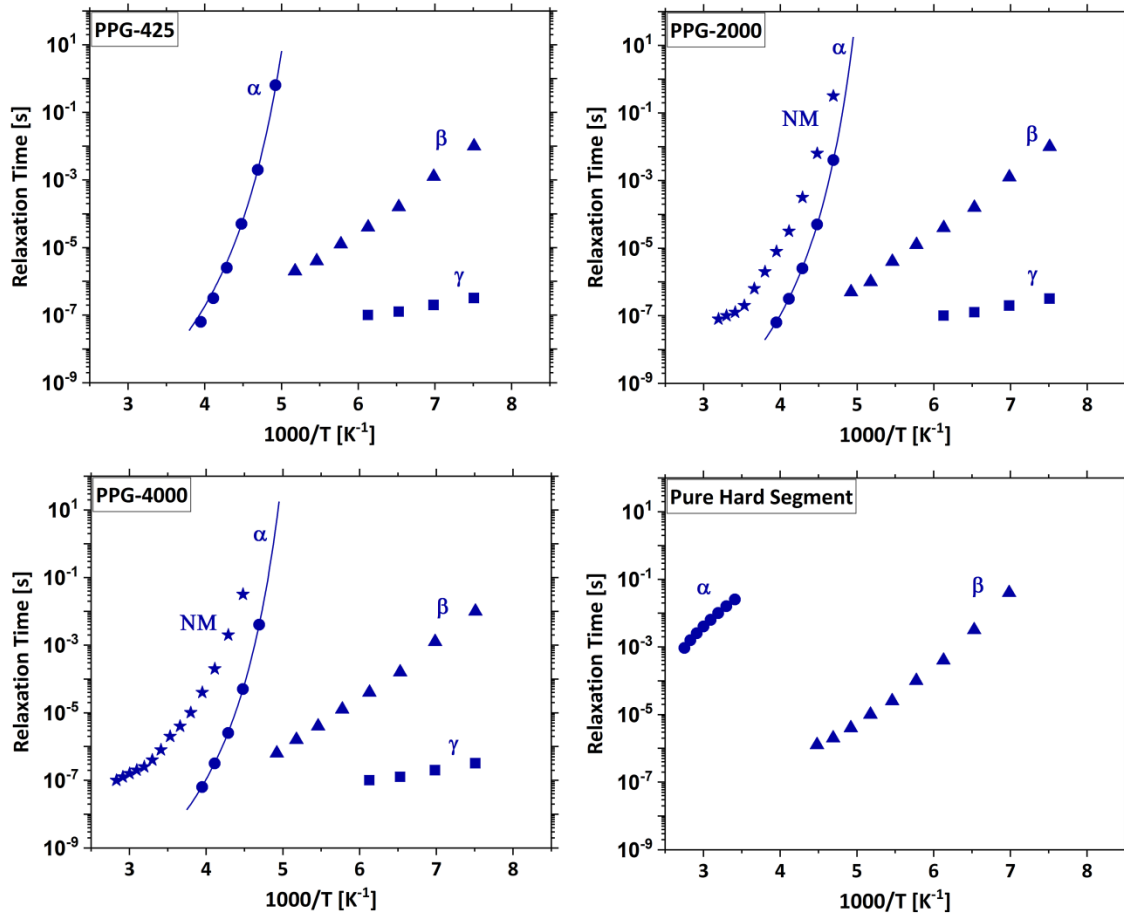

**Figure S6.** Characteristic relaxation times versus inverse temperature for the pure soft and hard segments. The fitting based on VFT equation was shown with solid lines.

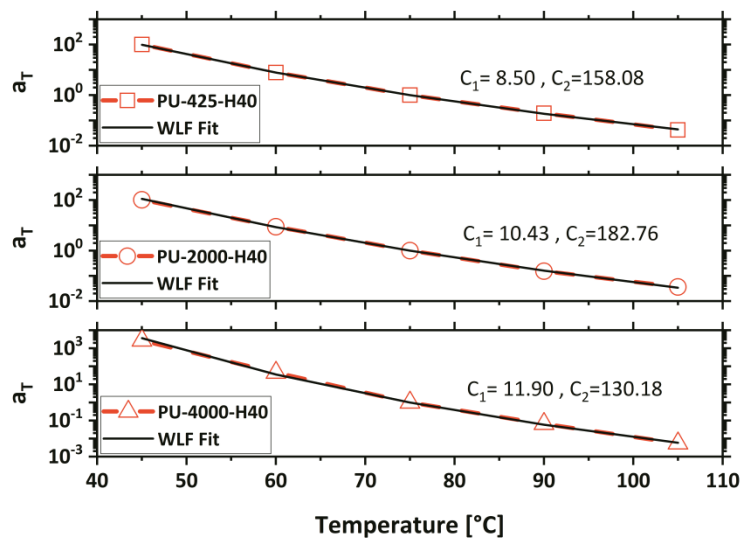

**Figure S7.** The used Shift factors of time-temperature superposition in figure 10.

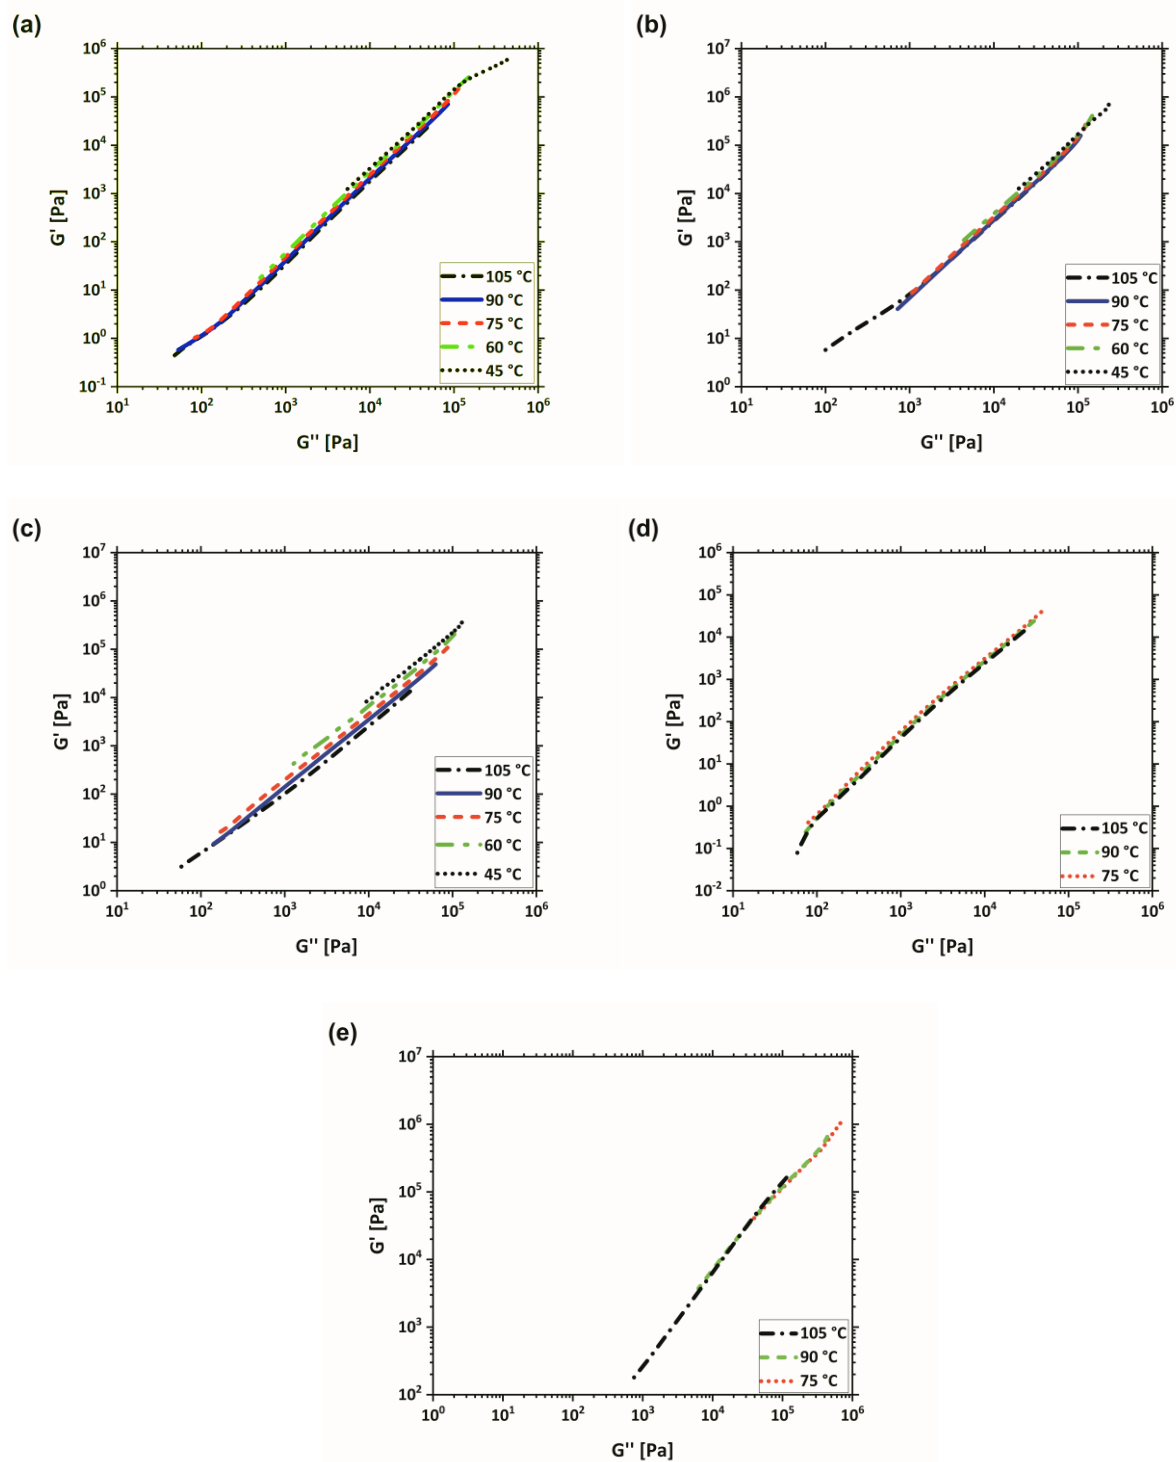

**Figure S8.** Rheological Cole-Cole plot for: (a) PU-425-H40; (b) PU-2000-H40; (c) PU-4000-H40; (d) PU-2000-H20; and (d) PU-2000-H60 at different temperature

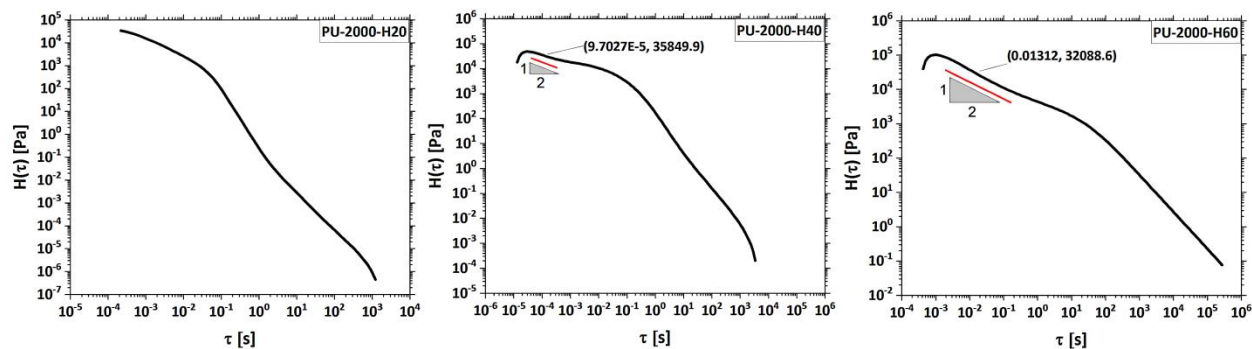

**Figure S9.** Relaxation spectra for the model PUs with similar soft segments at 90 °C. The selected points were used in Bueche–Ferry law.

**Table S1** Segmental Rouse times in sec and friction coefficients in kg/s resulted from segmental relaxation processes of pure segments and PPG-2000-based PUs at 90 °C.

| Sample      | $\alpha_{SS}$ |              | $\alpha_{HS}$ |              | $\alpha_{SS-rich}$ |                   | $\alpha_{HS-rich}$ |                   |
|-------------|---------------|--------------|---------------|--------------|--------------------|-------------------|--------------------|-------------------|
|             | $\tau_S$      | $\zeta_{SS}$ | $\tau_S$      | $\zeta_{HS}$ | $\tau_S$           | $\zeta_{SS-rich}$ | $\tau_S$           | $\zeta_{HS-rich}$ |
| PPG-425     | 1.81E-10      | 1.70E-11     | ---           | ---          | ---                | ---               | ---                | ---               |
| PPG-2000    | 1.08E-10      | 1.02E-11     | ---           | ---          | ---                | ---               | ---                | ---               |
| PPG-4000    | 1.08E-10      | 1.02E-11     | ---           | ---          | ---                | ---               | ---                | ---               |
| Pure HS     | ---           | ---          | 9.33E-4       | 3.32E-5      | ---                | ---               | ---                | ---               |
| PU-2000-H20 | ---           | ---          | ---           | ---          | 1.09E-9            | 1.50E-11          | 1.58E-8            | 2.16E-10          |
| PU-2000-H40 | ---           | ---          | ---           | ---          | 1.42E-10           | 1.94E-12          | 4.98E-7            | 6.79E-9           |
| PU-2000-H60 | ---           | ---          | ---           | ---          | 3.99E-10           | 5.44E-12          | 1.01E-3            | 1.38E-5           |
